# Supplementary material
Source: ML conference proceedings conference paper supplement (https://openreview.net/forum?id=LPG8pPSfQD)
Supplement: supplementary_material [file attachment]

# Supplementary Material for DistRL in ICLR 2025

Submission Number: 7873

We are planning to make our code **open-sourced** in the future. We put all the necessary codes, data, checkpoints and detailed instructions for reproducing our experiments results in this repository:

<https://anonymous.4open.science/r/DistRL-C41F>
